# Supplementary material for: Quantitative and rapid detection of spinosad and spinetoram by a gold nanoparticle-based immunostrip
Source: Royal Society of Chemistry journal article supplement (doi:10.1039/d1ay01790j), 2022-01-01
Supplement: d1ay01790j1.pdf [file d1ay01790j1.pdf]

*Supporting information*

**Quantitative and rapid detection of spinosad and spinetoram by  
gold nanoparticle-based immunostrip**

Xianlu Lei<sup>a,b</sup>, Xinxin Xu<sup>a,b</sup>, Li Wang<sup>a,b</sup>, Liqiang Liu<sup>a,b</sup>, Hua Kuang<sup>a,b\*</sup>, Liguang Xu<sup>a,b</sup>, Chuanlai Xu<sup>a,b\*</sup>

<sup>a</sup>State Key Laboratory of Food Science and Technology, Jiangnan University, Wuxi, People's Republic of China;

<sup>b</sup>International Joint Research Laboratory for Biointerface and Biodetection, and School of Food Science and Technology, Jiangnan University, Wuxi, People's Republic of China;

\*Corresponding author. Email: kuangh@jiangnan.edu.cn; xcl@jiangnan.edu.cn;

## Captions:

**Fig. S1** The LC-MS and <sup>1</sup>H NMR spectrum of hapten SPI-HS. (a) LC-MS, (b) <sup>1</sup>H NMR.

**Fig. S2** MALDI-TOF MS spectra of three immunogen conjugates and BSA. BSA (a), SPI-HS-BSA 30 (b), SPI-HS-BSA 60 (c), SPI-HS-BSA 90 (d).

**Fig. S3** The TEM image (a) and ultraviolet-visible absorption spectrum (b) of CG and CG-mAb.

**Fig. S4** Optimization of basic buffer containing 5% (m/v) different additives (b), the volumes of 0.1M K<sub>2</sub>CO<sub>3</sub> (b), and the amounts of mAb (b). The amounts of mAb: A, 12 μg/mL; B, 8 μg/mL. the volumes of 0.1M K<sub>2</sub>CO<sub>3</sub>: 1, 8 μl/mL; 2, 12 μl/mL; 3, 16 μl/mL. SPI=20 ng/mL; Et-SPI=20 ng/mL.

**Fig. S5** The test pictures of LF-ICS for detection of SPI (a, c, e, and g) and Et-SPI (b, d, f, and h) in PBS (a and b), rice (c and d), tea (e and f), and onion (g and h).

**Fig. S6** The specificity of the LF-ICS with spinosad (2), spinosyn A (3), spinosyn D (4), spinetoram (5), spinetoram J (6), and spinetoram L (7) at 10 ng/mL. 1= 0 ng/mL in PBS.

**Fig. S7** The effect of dilution ratio (/n) on the sensitivity of the LF-ICS. (a) rice; (b) tea; (c) onion. N, negative sample; S, spiked sample.

**Tab. S1** Antisera evaluation of mice from different antigens.

**Tab. S2** Cross-reaction results of the mAbs.

**Tab. S3** The T/C values and inhibition rates (IR) of the strips shown in Figure S5. N, negative sample; S, spiked sample.

**Tab. S4** The summary of the references about the methods for determination of SPI and Et-SPI.

**Fig. S1** The LC-MS and  $^1\text{H}$  NMR spectrum of hapten SPI-HS. (a) LC-MS, (b)  $^1\text{H}$  NMR.

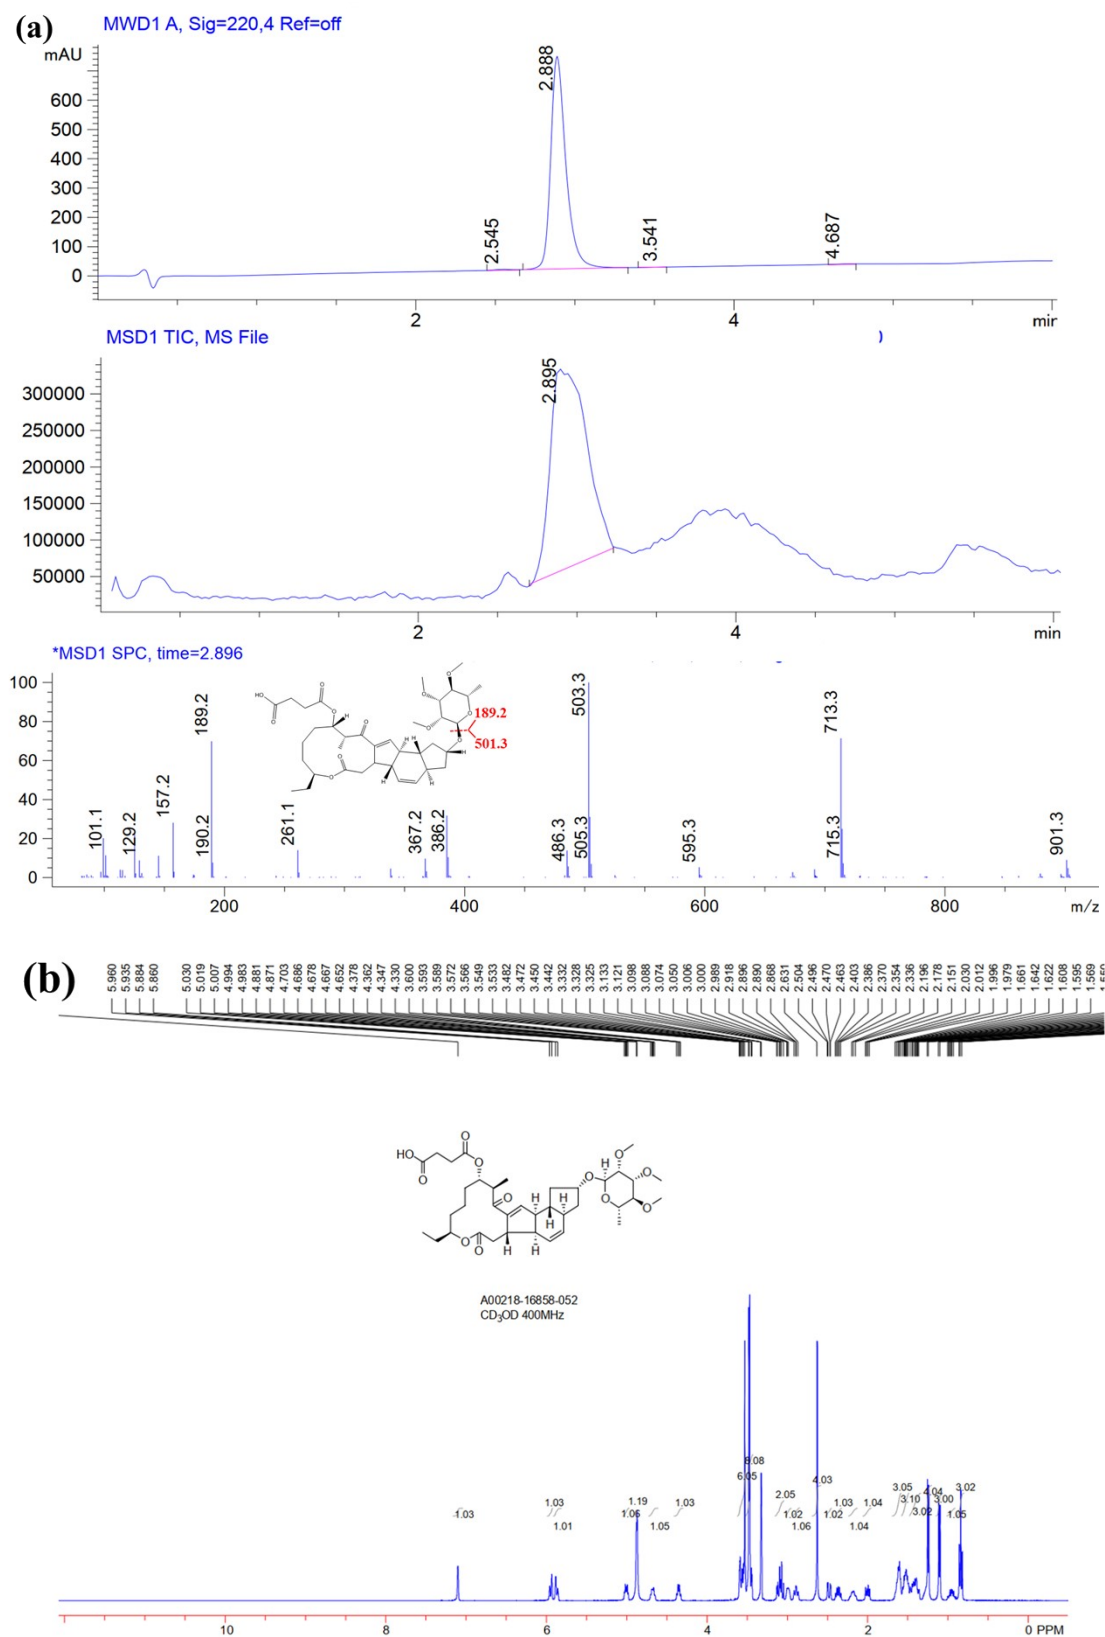

**Fig. S2** MALDI-TOF MS spectra of three immunogen conjugates and BSA. BSA (a), SPI-HS-BSA 30 (b), SPI-HS-BSA 60 (c), SPI-HS-BSA 90 (d).

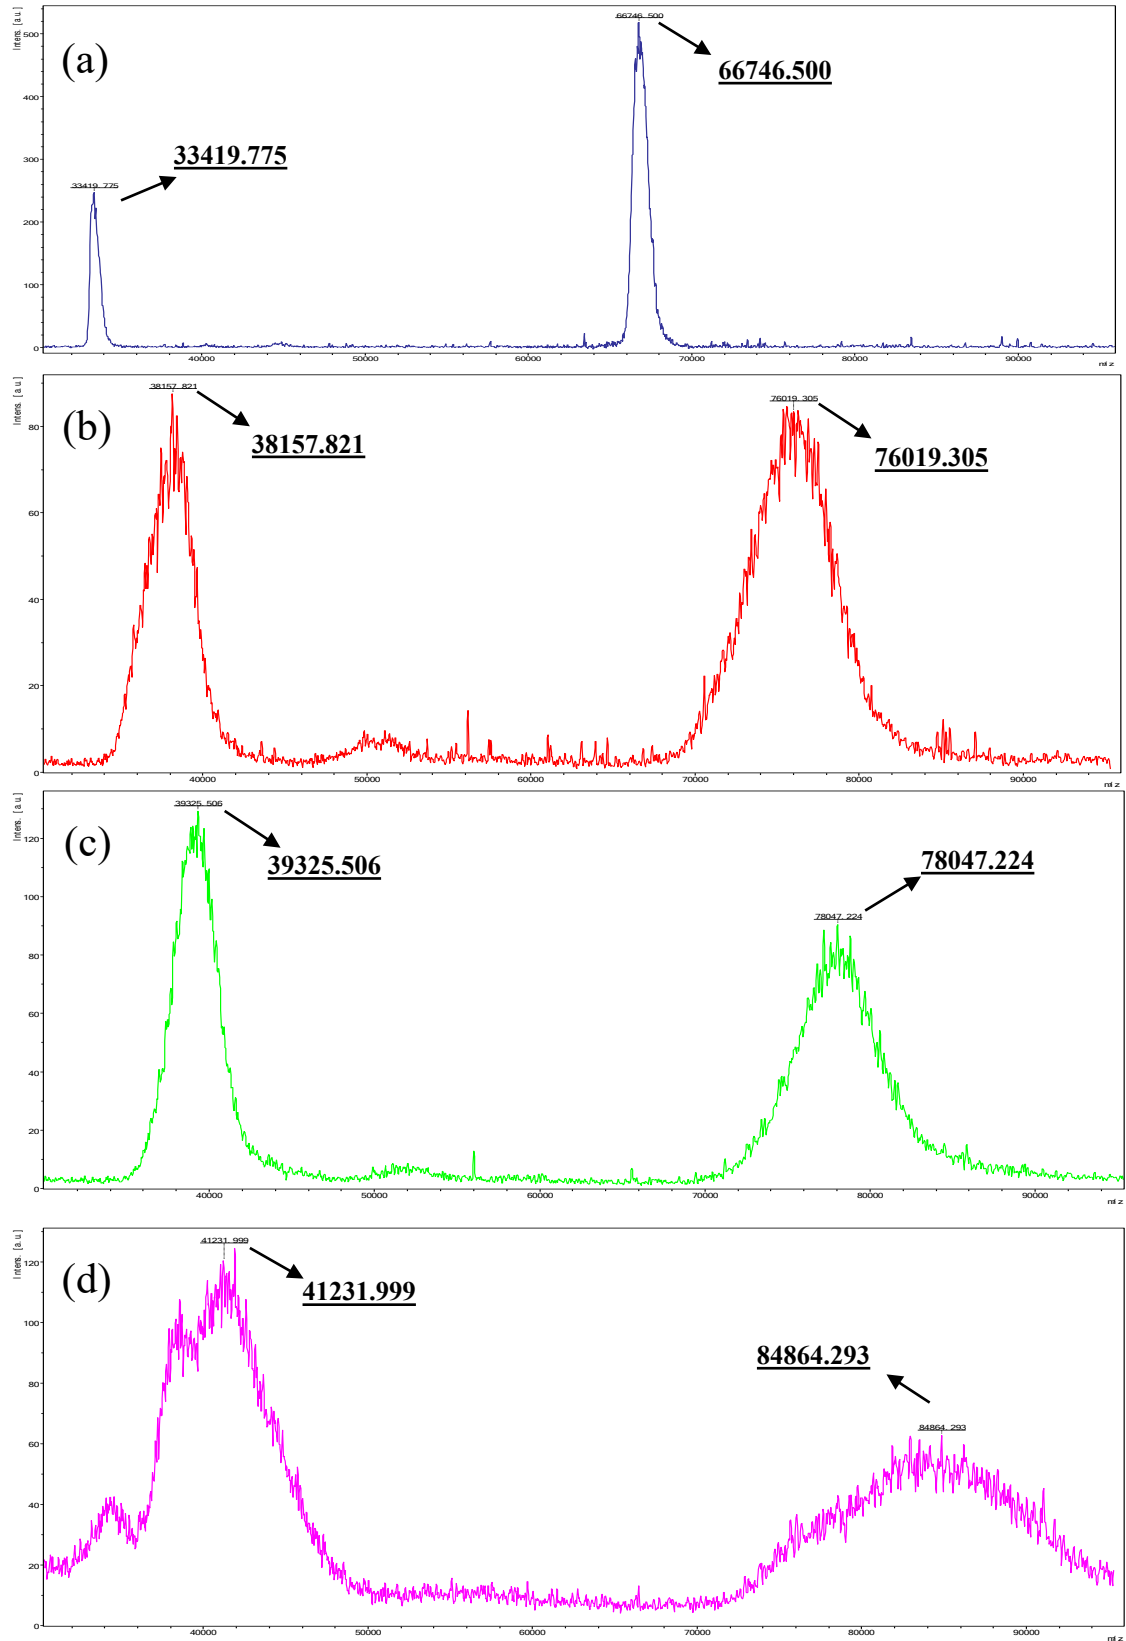

**Fig. S3** The TEM image (a) and ultraviolet-visible absorption spectrum (b) of CG and CG-mAb.

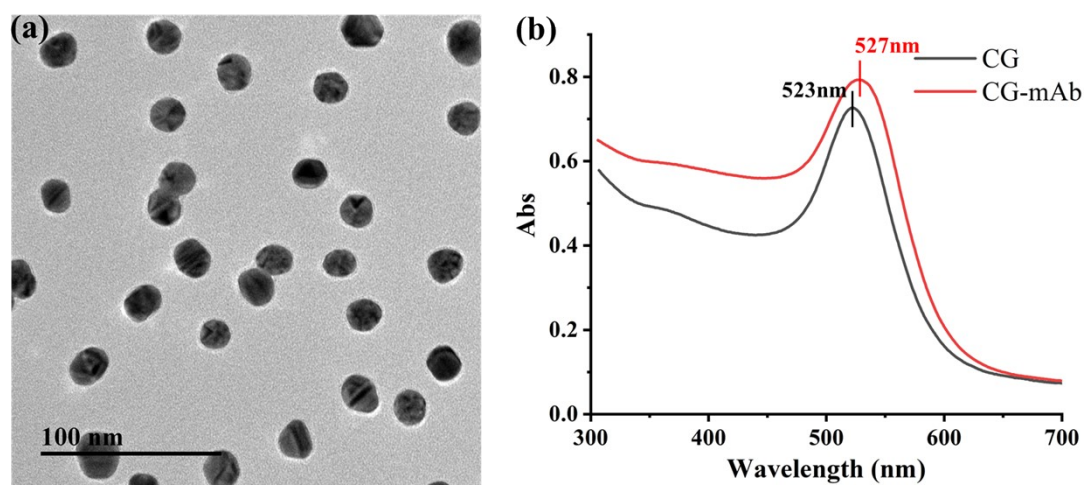

**Fig. S4** Optimization of basic buffer containing 5% (m/v) different additives (b), the volumes of 0.1M K<sub>2</sub>CO<sub>3</sub> (b), and the amounts of mAb (b). The amounts of mAb: A, 12 μg/mL; B, 8 μg/mL. the volumes of 0.1M K<sub>2</sub>CO<sub>3</sub>: 1, 8 μl/mL; 2, 12 μl/mL; 3, 16 μl/mL. SPI=20 ng/mL; Et-SPI=20 ng/mL.

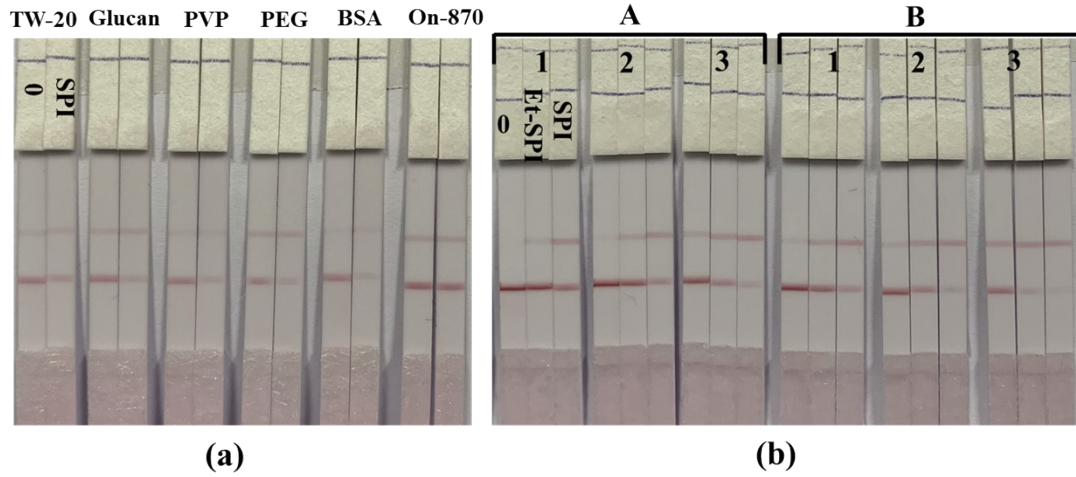

**Fig. S5** The test pictures of LF-ICS for detection of SPI (a, c, e, and g) and Et-SPI (b, d, f, and h) in PBS (a and b), rice (c and d), tea (e and f), and onion (g and h).

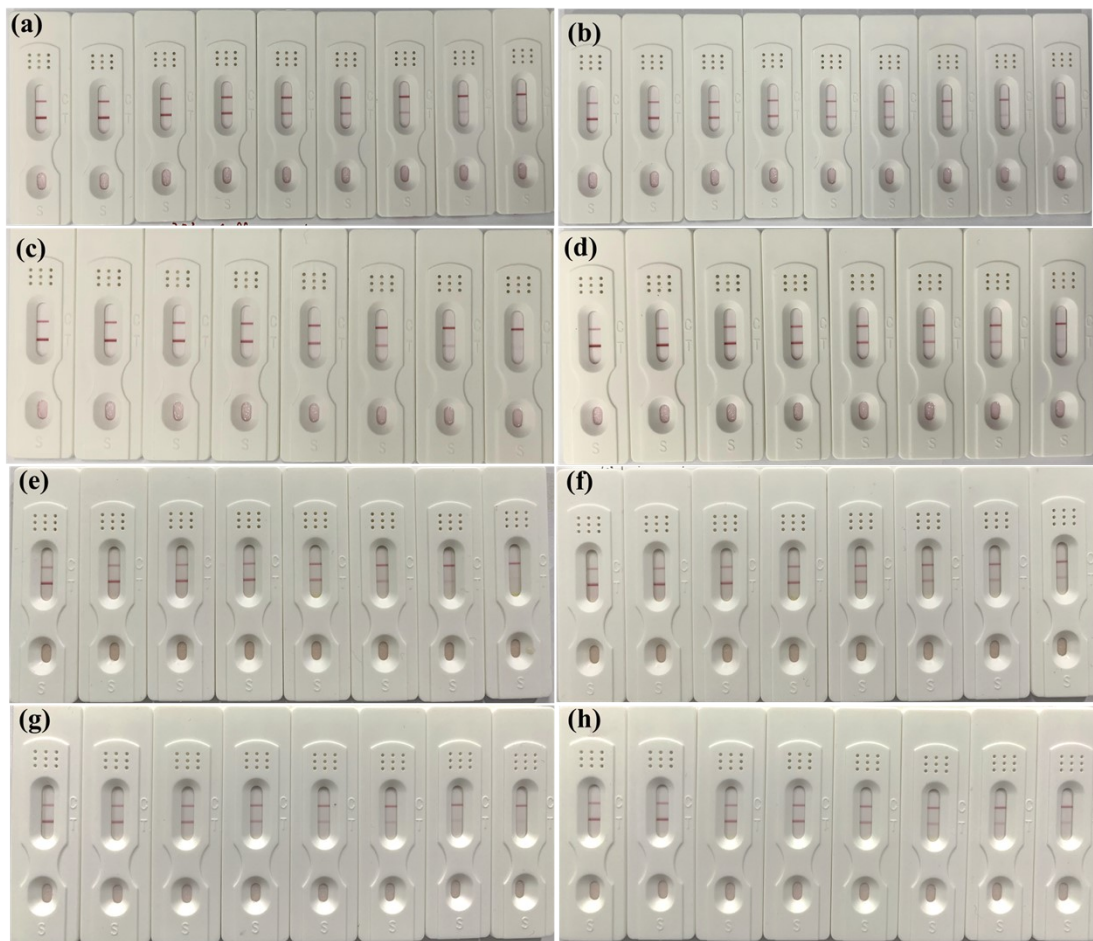

**Fig. S6** The specificity of the LF-ICS with spinosad (2), spinosyn A (3), spinosyn D (4), spinetoram (5), spinetoram J (6), and spinetoram L (7) at 10 ng/mL. 1= 0 ng/mL in PBS.

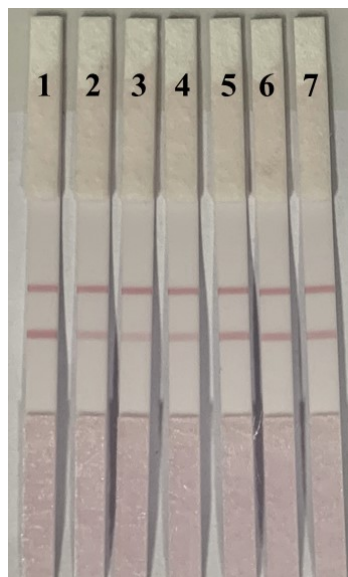



**Fig. S7** The effect of dilution ratio ( $/n$ ) on the sensitivity of the LF-ICS. (a) rice; (b) tea; (c) onion. N, negative sample; S, spiked sample.

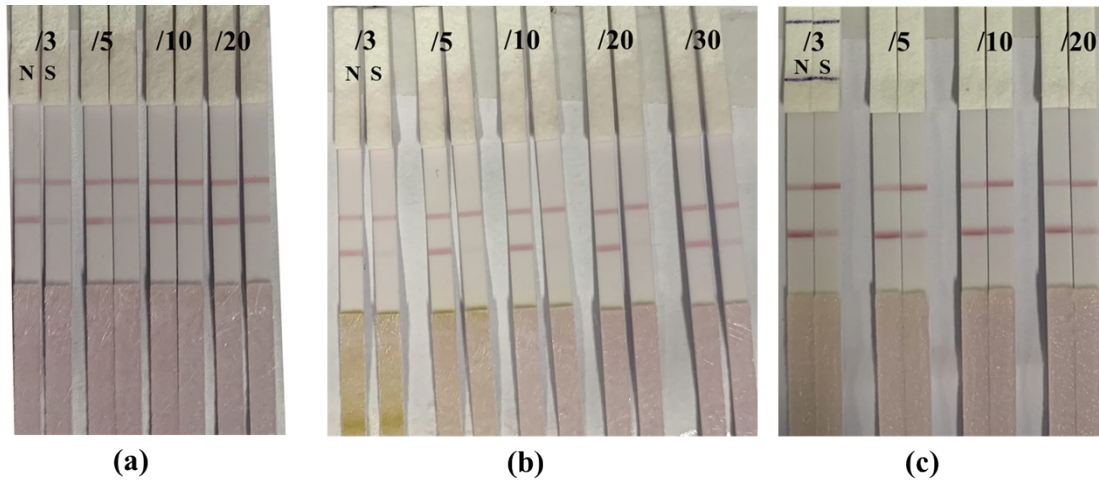

**Tab. S1** Antisera evaluation of mice from different antigens.

| Antigens           | Standards<br>(ng/mL) | Mice  |       |            |       |       |
|--------------------|----------------------|-------|-------|------------|-------|-------|
|                    |                      | 1#    | 2#    | 3#         | 4#    | 5#    |
| SPI-HS-BSA<br>30:1 | 0                    | 1.894 | 1.625 | 1.668      | 1.412 | 1.55  |
|                    | 10(SPI)              | 1.225 | 0.875 | 1.022      | 0.686 | 1.119 |
|                    | IR (%)               | 35%   | 46%   | 39%        | 51%   | 28%   |
|                    | 10(Et-SPI)           | 1.477 | 1.106 | 1.231      | 0.952 | 1.289 |
|                    | IR (%)               | 22%   | 32%   | 26%        | 33%   | 17%   |
| SPI-HS-BSA<br>60:1 | 0                    | 1.762 | 1.698 | 1.852      | 1.996 | 1.663 |
|                    | 10(SPI)              | 0.941 | 0.835 | 0.595      | 0.863 | 0.967 |
|                    | IR (%)               | 47%   | 51%   | <b>68%</b> | 57%   | 42%   |
|                    | 10(Et-SPI)           | 1.258 | 1.114 | 1.033      | 1.319 | 1.21  |
|                    | IR (%)               | 29%   | 34%   | <b>44%</b> | 34%   | 27%   |
| SPI-HS-BSA<br>90:1 | 0                    | 1.601 | 2.104 | 1.686      | 1.913 | 1.779 |
|                    | 10(SPI)              | 0.648 | 1.39  | 0.965      | 0.891 | 0.925 |
|                    | IR (%)               | 60%   | 34%   | 43%        | 53%   | 48%   |
|                    | 10(Et-SPI)           | 0.946 | 1.617 | 1.203      | 1.182 | 1.19  |
|                    | IR (%)               | 41%   | 23%   | 29%        | 38%   | 33%   |

Inhibition ratio (IR) =  $(1 - OD_{450}(10 \text{ ng/mL}) / OD_{450}(0 \text{ ng/mL})) * 100\%$ .

**Tab. S2** Cross-reaction results of the mAbs.

| Chemicals    | Structure                                                                           | IC <sub>50</sub> (ng/mL) | CR     |
|--------------|-------------------------------------------------------------------------------------|--------------------------|--------|
| Spinosad     | A mixture with major component of spinosyn A and minor component of spinosyn D      | 0.68                     | 100.0% |
| Spinosyn A   | 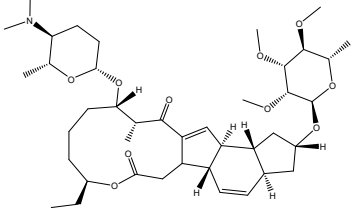   | 0.61                     | 111.4% |
| Spinosyn D   |    | 0.89                     | 76.4%  |
| Spinetoram   | A mixture with major component of spinetoram J and minor component of spinetoram L  | 1.89                     | 36.0 % |
| Spinetoram J |  | 1.64                     | 41.5 % |
| Spinetoram L |  | 1.81                     | 37.6 % |

**Tab. S3** The T/C values and inhibition rates (IR) of the strips shown in Figure S5. N, negative sample; S, spiked sample.

| Samples | Repetition |   | /n   |        |      |        |      |        |      |        |      |        |
|---------|------------|---|------|--------|------|--------|------|--------|------|--------|------|--------|
|         |            |   | /3   |        | /5   |        | /10  |        | /20  |        | /30  |        |
|         |            |   | T/C  | IR (%) |
| Rice    | 1          | N | 1.35 | 80.0   | 1.22 | 86.9   | 1.16 | 54.3   | 0.98 | 34.7   |      |        |
|         |            | S | 0.27 |        | 0.16 |        | 0.53 |        | 0.64 |        |      |        |
|         | 2          | N | 1.31 | 75.6   | 1.15 | 88.7   | 1.19 | 59.7   | 1.05 | 41.9   |      |        |
|         |            | S | 0.32 |        | 0.13 |        | 0.48 |        | 0.61 |        |      |        |
|         | 3          | N | 1.28 | 82.0   | 1.28 | 91.4   | 1.12 | 58.0   | 0.96 | 30.2   |      |        |
|         |            | S | 0.23 |        | 0.11 |        | 0.47 |        | 0.67 |        |      |        |
| Tea     | 1          | N | 1.42 | 84.5   | 1.31 | 87.8   | 1.33 | 92.5   | 1.25 | 90.4   | 1.13 | 63.7   |
|         |            | S | 0.22 |        | 0.16 |        | 0.1  |        | 0.12 |        | 0.41 |        |
|         | 2          | N | 1.4  | 81.4   | 1.36 | 84.6   | 1.4  | 93.6   | 1.31 | 92.4   | 1.22 | 59.8   |
|         |            | S | 0.26 |        | 0.21 |        | 0.09 |        | 0.1  |        | 0.49 |        |
|         | 3          | N | 1.35 | 80.0   | 1.39 | 86.3   | 1.31 | 90.8   | 1.29 | 92.2   | 1.17 | 67.5   |
|         |            | S | 0.27 |        | 0.19 |        | 0.12 |        | 0.1  |        | 0.38 |        |
| Onion   | 1          | N | 2.31 | 87.0   | 2.12 | 83.0   | 2.2  | 81.4   | 2.08 | 78.4   |      |        |
|         |            | S | 0.3  |        | 0.36 |        | 0.41 |        | 0.45 |        |      |        |
|         | 2          | N | 2.4  | 86.7   | 2.15 | 78.6   | 2.08 | 76.4   | 1.97 | 78.7   |      |        |
|         |            | S | 0.32 |        | 0.46 |        | 0.49 |        | 0.42 |        |      |        |
|         | 3          | N | 2.38 | 89.5   | 2.27 | 81.9   | 2.04 | 77.0   | 2.02 | 75.7   |      |        |
|         |            | S | 0.25 |        | 0.41 |        | 0.47 |        | 0.49 |        |      |        |

**Tab. S4** The summary of the references about the methods for determination of SPI and Et-SPI.

| References | Years | Methods                                                     | Samples                                                        | Drugs<br>(cross-reaction, %)                                                                         | <sup>a</sup> LOD<br>(ng/g or ng/mL)                                                                 | Detection<br>time (min) | recovery<br>values (%) | <sup>b</sup> CV( <sup>c</sup> RSD<br>D, %) |
|------------|-------|-------------------------------------------------------------|----------------------------------------------------------------|------------------------------------------------------------------------------------------------------|-----------------------------------------------------------------------------------------------------|-------------------------|------------------------|--------------------------------------------|
| [1]        | 2019  | ic-Elisa                                                    | Milk<br>fruits<br>vegetables                                   | spinosyn A (100)<br>spinosyn B (80.4)<br>spinosyn D (75.7)                                           | 0.63                                                                                                | >60                     | 78.1-103.2             | 3.3-7.3                                    |
| [2]        | 1999  | Fluorescent<br>Excitation<br>Transfer                       | water                                                          | spinosyn A                                                                                           | 0.01                                                                                                | 20-30                   | 96-120                 |                                            |
| [3]        | 2000  | magnetic particle-<br>based<br>immunoassay (IA)<br>test kit | Water<br>Sediment<br>Crops<br>animal tissues                   | spinosyns A (100) and D (15)<br>spinosyn B (48), spinosyn K<br>(32)<br>and N-demethylspinosyn D (16) | 0.1 (water)<br>50 (sediment)<br>10 (crops and<br>animal tissues)                                    |                         | 77-112                 |                                            |
| [4]        | 2021  | UPLC-MS/MS                                                  | tea                                                            | Spinetoram J<br>Spinetoram L<br>N-demethyl- Spinetoram J<br>N-formyl- Spinetoram J                   | 20 (Spinetoram J,<br>Spinetoram L<br>N-demethyl-<br>Spinetoram J)<br>50 (N-formyl-<br>Spinetoram J) | >30                     | 72.4-105.7             | 0.9-16.1                                   |
| [5]        | 2012  | HPLC                                                        | Tomato                                                         | spinetoram                                                                                           | 10                                                                                                  |                         | 88.5-97.5              | 5.3-12.2                                   |
| [6]        | 2015  | LC-MS/MS                                                    | soil, rice<br>straw, paddy<br>water, husk<br>and brown<br>rice | Spinetoram J<br>Spinetoram L                                                                         | 1 (husk, rice and<br>straw); 0.5 (soil and<br>brown rice); 0.25<br>(paddy water)                    |                         | 72.7-100.3             | 1.9-8.1                                    |

<sup>a</sup>LOD, low of detection; <sup>b</sup>CV, coefficient variable; <sup>c</sup>RSD, relative standard deviation.

## References:

1. Lan, J., et al., Development of a monoclonal antibody-based immunoaffinity chromatography and a sensitive immunoassay for detection of spinosyn A in milk, fruits, and vegetables. *Food Control*, 2019. 95: p. 196-205.
2. Lee, M., D.R. Walt, and P. Nugent, Fluorescent excitation transfer immunoassay for the determination of spinosyn A in water. *Journal of agricultural and food chemistry*, 1999. 47(7): p. 2766-2770.
3. Young, D.L., et al., Determination of spinosad and its metabolites in food and environmental matrices. 3. Immunoassay methods. *Journal of agricultural and food chemistry*, 2000. 48(11): p. 5146-5153.
4. Li, H., et al., Residue degradation and metabolism of spinetoram in tea: A growing, processing and brewing risk assessment. *Food Control*, 2021. 125(3): p. 107955.
5. Malhat and F. Mahmoud, Simultaneous Determination of Spinetoram Residues in Tomato by High Performance Liquid Chromatography Combined with QuEChERS Method. *Bulletin of Environmental Contamination & Toxicology*, 2013. 90(2): p. 222-226.
6. Zhao, L., et al., Degradation kinetics of the insecticide spinetoram in a rice field ecosystem. *Chemosphere*, 2015. 119: p. 1185-1191.
